# Supplementary material
Source: Springer Nature journal article supplement (https://www.springermedizin.de/resource/supplementary/12889_2012_5049_MOESM10_ESM.pdf/9493162)

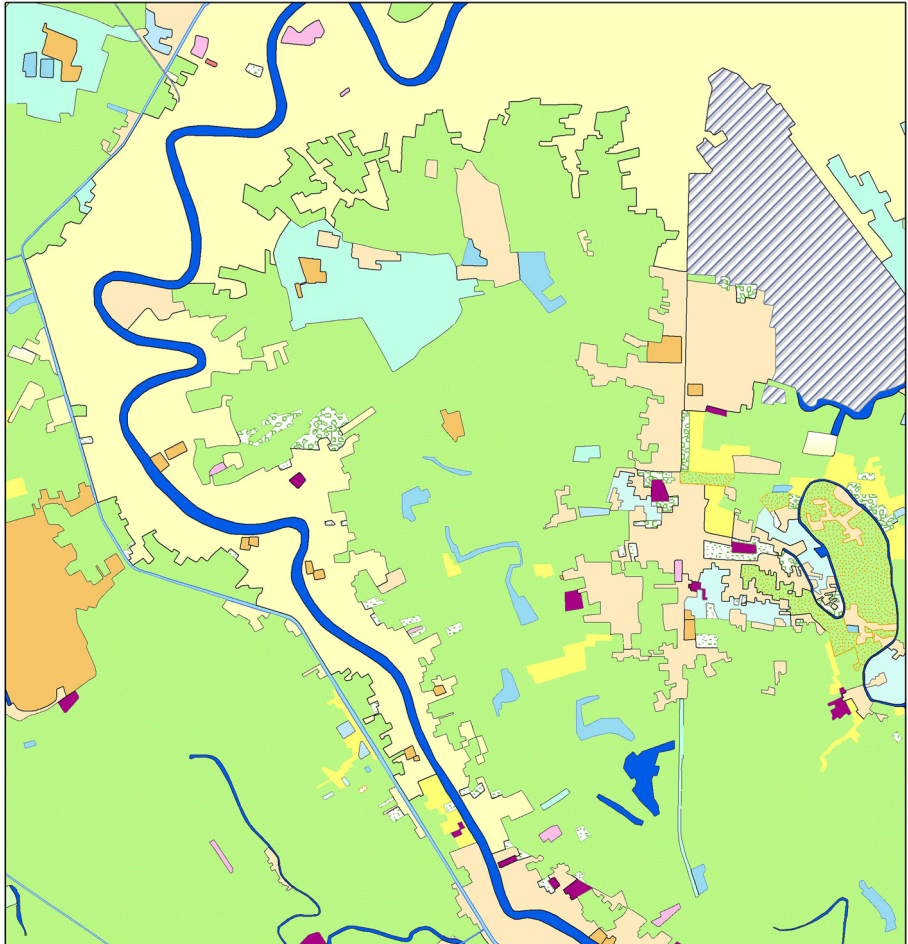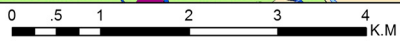

- |                   |                            |                              |
|-------------------|----------------------------|------------------------------|
| Aquacultural land | Forest plantation          | Landfill                     |
| Build-up village  | Gassoline station/workshop | Marsh/swamp                  |
| Cemetery          | Golf course                | Paddy field                  |
| City              | Horticulture               | Mine                         |
| Deciduous forest  | Industrial land            | Natural water body           |
| Field crop        | Institutional land         | Orchard                      |
| Pit               | Perennial                  | Marsh/swamp/rice paddy       |
| Rangeland         | Perennial/orchard          | Pasture/farm house           |
| Recreation area   | Reservoir                  | Transportation/communication |

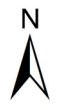

Supplement: MOESM10 [file 9493162]
